# Supplementary material for: Unraveling the future of genomics: CRISPR, single-cell omics, and the applications in cancer and immunology
Source: Front Genome Ed. 2025 Apr 11;7:1565387. doi: 10.3389/fgeed.2025.1565387 (PMC12021818; doi:10.3389/fgeed.2025.1565387)
Supplement: Supplementary file 2 [file Table3.xlsx]

## Sheet: Sheet1
Supplementary Table 3: Overview of sgRNA/pegRNA design tools
Tool	Design	CRISPR system	link	web-system	Algorithm
CGD	on-target	Cas9/Cas12a/CRISPRi/a	http://big.hanyang.ac.kr:2195/CGD	Web/Standalone	Learning based
CINDEL	on-target	Cas12a	http://big.hanyang.ac.kr/cindel	Web/Standalone	Learnig based
DeepCpf1	on-target	Cas12a	https://deepcrispr.info	Web/Standalone	Deep learning
GPP-sgRNA designer	on/off-target	Cas9	https://portals.broadinstitute.org/gpp/public/analysis-tools/sgrna-design	Web/Standalone	Learning based
CRISPRScan	off-target	Cas9 and Cas12a	https://www.crisprscan.org	Web	Heuristic based
CHOP-CHOP	on/off-target	Cas9/Cas12a/Cas13/TALEN	https://chopchop.cbu.uib.no/	Web	Ingerated with ML and genome browser
CRISPOR	on/off-target	Cas9, Cas9 orthologus and variants	https://crispor.tefor.net/	Web	Integrated with ML and genome browser
CRISPRREGEN	off-target	Cas9, Cas9 orthologus and variants	https://www.rgenome.net/cas-designer/	Web	Heuristic based
Elevation	on/off-target	Cas9	https://www.microsoft.com/en-us/research/project/crispr/	Web/standalone	Learning based
CCTop	off-target	Cas9, Cas9 orthologus and variants	https://cctop.cos.uni-heidelberg.de	Web	Heuristic based
DeepSpCas9Variants	on-target	Cas9, Cas9 variants	http://deepcrispr.info/DeepSpCas9variants	Web/Standalone	Deep learning
Deep-PE	on-target	Prime editing system (SpCas9)	http://deepcrispr.info/DeepPrime	Web	Deep learning
Deep-BE	on-target	Base editing system (Cas9 and variants)	https://github.com/NahyeKim/DeepBE	Web	Deep learning
BEEP	on-target	Base editing system (Cas9 and variants)	http://beep.weililab.org	Web	Deep learning
DeepCRISPR	on/off-target	Cas9	https://www.deepcrispr.net/	Web	Deep learning
CRISPR-P	on-target	Cas9 variants	https://www.genome.arizona.edu/crispr2/	Web	Heuristic based
EuPaGDT	on-target	Cas9	https://grna.ctegd.uga.edu/	Web	Heuristic based
DeepHF	on-target	SpCas9-HF and Cas9-HF	https://www.deephf.com/	Web	Deep learning
